# Supplementary material for: Transcriptomics in Toxicogenomics, Part III: Data Modelling for Risk Assessment
Source: PubMed Central journal article supplement (PMC7221955; doi:10.3390/nano10040708), 2020-04-08
Supplement: nanomaterials-10-00708-s001.pdf [file nanomaterials-10-00708-s001.pdf]

Supplementary Table S1. We list some well-known clustering algorithms, including their type of classification, similarity measures that can be used, how the choice of the number of clusters is handled, and algorithm input.

| <b>Name</b>                                                                                                               | <b>Type of classification</b>            | <b>Similarity concept</b> | <b>k</b>                      | <b>Input</b>                                         |
|---------------------------------------------------------------------------------------------------------------------------|------------------------------------------|---------------------------|-------------------------------|------------------------------------------------------|
| K-means [A comparative study of efficient initialization methods for the k-means clustering algorithm. 2013]              | Hard classification                      | Euclidean distance        | k as input                    | Object coordinates, k                                |
| K-medians                                                                                                                 | Hard classification                      | Manhattan distance        | k as input                    | Object coordinates, k                                |
| Partitioning around medoids (PAM)                                                                                         | Hard classification                      | User provided similarity  | k as input                    | Similarities, k                                      |
| Affinity propagation [Clustering by Passing Messages Between Data Points. 2007]                                           | Hard classification                      | User provided similarity  | Chooses k                     | Similarities, damping factor                         |
| Density based [Density-based clustering. 2011]                                                                            | Hard classification                      | User provided distance    | Chooses k                     | Neighbours relation, min neighbours for dense region |
| Spectral clustering [A tutorial on spectral clustering. 2007]                                                             | Hard classification                      | User provided similarity  | k as input                    | Similarities, k                                      |
| Hierarchical clustering [Assessment of Drugs Toxicity and Associated Biomarker Genes Using Hierarchical Clustering. 2019] | Hard classification                      | User provided distance    | Offers options for each k     | Distances                                            |
| Mixture models [Finite mixture models and model-based clustering. 2010; Model-based clustering of microarray              | Probabilistic type (soft classification) | Uses coordinates          | Depends on specific algorithm | Object coordinates, perhaps k                        |

|                                                                                                                                                                                                                                                                                                                                                                            |                               |                                     |                               |                               |
|----------------------------------------------------------------------------------------------------------------------------------------------------------------------------------------------------------------------------------------------------------------------------------------------------------------------------------------------------------------------------|-------------------------------|-------------------------------------|-------------------------------|-------------------------------|
| expression data via latent Gaussian mixture models. 2010; Model-based clustering of high-dimensional data: A review. 2014]                                                                                                                                                                                                                                                 |                               |                                     |                               |                               |
| Fuzzy clustering [Review on Fuzzy Clustering Algorithms. 2008]                                                                                                                                                                                                                                                                                                             | Soft classification           | Depends on specific algorithm       | Depends on specific algorithm | Depends on specific algorithm |
| Biclustering (a.k.a. co-clustering) [A systematic comparative evaluation of biclustering techniques. 2017; Biclustering as Strategy for Improving Feature Selection in Consensus QSAR Modeling. 2018; Robust Co-clustering to Discover Toxicogenomic Biomarkers and Their Regulatory Doses of Chemical Compounds Using Logistic Probabilistic Hidden Variable Model. 2018] | Depends on specific algorithm | Depends on specific algorithm       | Depends on specific algorithm | Depends on specific algorithm |
| Consensus clustering [Analyzing High Dimensional Toxicogenomic Data Using Consensus Clustering. 2012]                                                                                                                                                                                                                                                                      | Hard classification           | Uses results from other clusterings | Chooses k                     | Previous clusterings          |
